# Supplementary material
Source: publisher figshare collection journal article supplement (https://tandf.figshare.com/ndownloader/files/17470904)
Supplement: Supplementary file 1 [file 17470904]

## Sheet: Sheet1
Supplemental data: Univariate and multivariate regression analysis for predictors of incontinence 3 months after RARP in total patients
Variables	Univariate models		Multivariate models
	OR (95% CI)	P-value	OR (95% CI)	P-value
Age	0.98 (0.88, 1.09)	0.75	1.06 (0.94, 1.20)	0.31
Preoperative UDS data
MUCP	0.99 (0.98, 1.00)	0.2
FLU	0.98 (0.94, 1.02)	0.25
First sensation	1.00 (0.99, 1.01)	0.54
MCC	1.00 (0.99, 1.00)	0.28
DO(+/-)	1.52 (0.47, 14.92)	0.49
Qmax	1.04 (0.94, 1.16)	0.44
Pdet Qmax	1.00 (0.97, 1.02)	0.75
Postoperative UDS data
MUCP	0.99 (0.96, 1.01)	0.37
FLU	0.97 (0.93, 1.02)	0.28
First sensation	1.00 (0.99, 1.01)	0.43
MCC	0.99 (0.98, 1.00)	0.14
DO(+/-)	6.18 (2.01, 18.98)	0.0015	7.17 (2.19, 23.47)	0.0011
Qmax	0.99 (0.92, 1.06)	0.74
Pdet Qmax	1.00 (0.97, 1.03)	1
UDS: urodynamic study; MUCP: maximum urethral closure pressure; FLU: functional length of urethra; FDV: first disire to void; MCC: maximum cystometric capacity; DO: detrussor overactivity; Qmax: maximum flow rate; Pdet Qmax: detrussor pressure at Qmax.
